# Supplementary material
Source: PubMed Central journal article supplement (PMC2709367)
Supplement: supp_M109.012047_jbc.M109.012047-1.pdf [file supp_M109.012047_jbc.M109.012047-1.pdf]

**Figure S1**

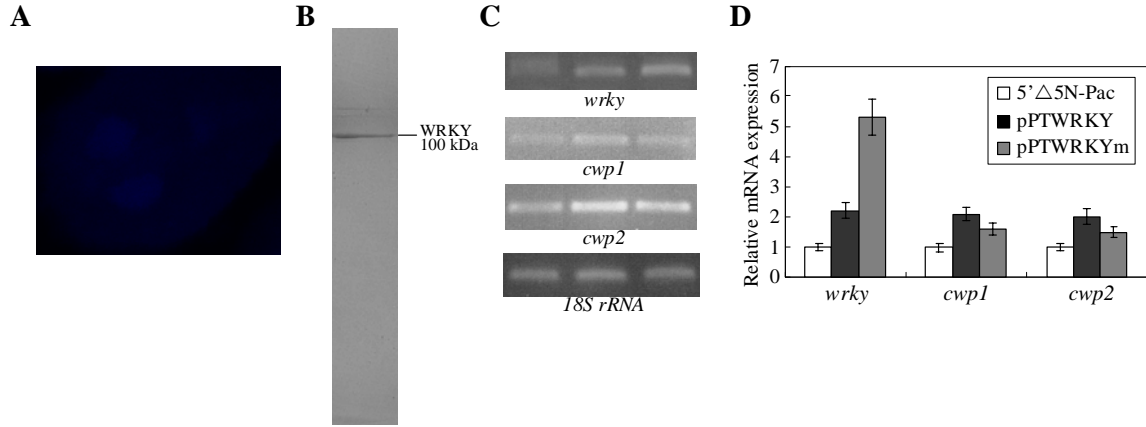

**Fig. S1.** Induction of *cwp1* and *cwp2* gene expression in the WRKY overexpressing cell line during vegetative growth. (A) The DAPI staining of cell nuclei in a cell staining positive for WRKY-HA in the pPTWRKY cell line during encystation. (B) Silver staining of purified WRKY. Recombinant WRKY protein was purified from *E. coli* using nickel affinity chromatography under native conditions. Purified WRKY protein was analyzed by SDS-PAGE and silver staining. (C) RT-PCR analysis of gene expression in the WRKY and WRKYm overexpressing cell line. The 5'  $\Delta$ 5N-Pac, pPTWRKY, and pPTWRKYm stable transfectants were cultured in growth medium for 24 h and then subjected to RT-PCR analysis. PCR was performed using primers specific for *wrky*, *cwp1*, *cwp2*, and *18S ribosomal RNA* genes. (D) Quantitative real-time PCR analysis of gene expression in the WRKY and WRKYm overexpressing cell line. Real-time PCR was performed using primers specific for *wrky*, *cwp1*, *cwp2*, and *18S ribosomal RNA*. Transcript levels were normalized to 18S ribosomal RNA levels. Fold changes in mRNA expression are shown as the ratio of transcript levels in pPTWRKY or pPTWRKYm cell line relative to the 5'  $\Delta$ 5N-Pac cell line. Results are expressed as the mean  $\pm$  standard error of at least three separate experiments.
